# Supplementary material for: Aneurysm Severity is Increased by Combined Mmp-7 Deletion and N-cadherin Mimetic (EC4-Fc) Over-Expression
Source: PubMed Central journal article supplement (PMC5725451; doi:10.1038/s41598-017-17700-8), 2017-12-11
Supplement: 41598_2017_17700_MOESM1_ESM.pdf [file 41598_2017_17700_MOESM1_ESM.pdf]

**ANEURYSM SEVERITY IS INCREASED BY COMBINED  
MMP-7 DELETION AND N-CADHERIN MIMETIC (EC4-FC)  
OVER-EXPRESSION**

Cressida A Lyon, Helen Williams, Rosaria Bianco, Steven  
Simmonds, Bethan A Brown, Kerry S Wadey, Frank Smith,  
Jason L Johnson, Sarah J George

## **Supplementary Figure Legends**

### Supplementary Figure 1

Uncropped Western blot for N-cadherin which was re-probed for the protein loading control ( $\beta$ -actin) of tissue lysates from HAAA and HA. Cropped images of two lanes (lane 3 = HA and lane 7 = HAAA) are shown in figure 1d.

MW: molecular weight marker. Arrows indicate the detected protein bands of full length N-cadherin (FLNC) of 130kDa and the N-cadherin fragment of 30kDa.

### Supplementary Figure 2

Representative images of immunohistochemistry in the mouse abdominal aortae for VSMC markers (actin and desmin), macrophage markers (GSL and CD68), and a marker of cellular senescence (p16). For DAB immunohistochemistry: positive cells are brown, negative nuclei are blue. For fluorescence: positive cells are green, negative nuclei are blue. p16 images are shown independently of DAPI to allow easier visualisation of the positive cells. Scale bar indicates 20 $\mu$ m. Analysis of immunohistochemistry is shown in Table 1.

### Supplementary Figure 3

Representative images of immunohistochemistry in the mouse abdominal aortae (PCNA, Ki67, cPARP and CC3) and human AAA (actin, CC3 and PCNA). Positive staining and non-immune immunoglobulin controls are shown for comparison. For DAB immunohistochemistry: positive cells are brown, negative nuclei are blue. For fluorescence: positive cells are green, negative nuclei are blue. Arrowheads indicate positive staining.

Supplementary Figure 1

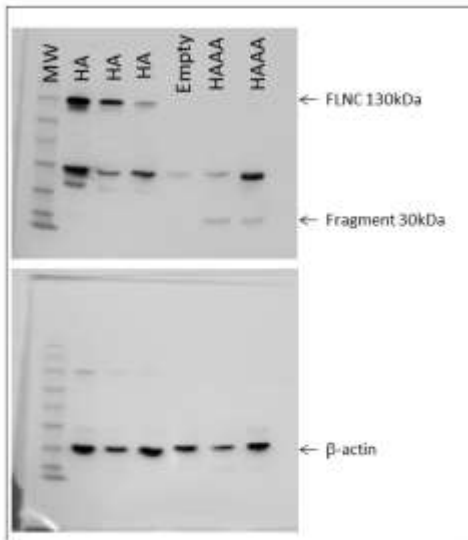

Supplementary Figure 2

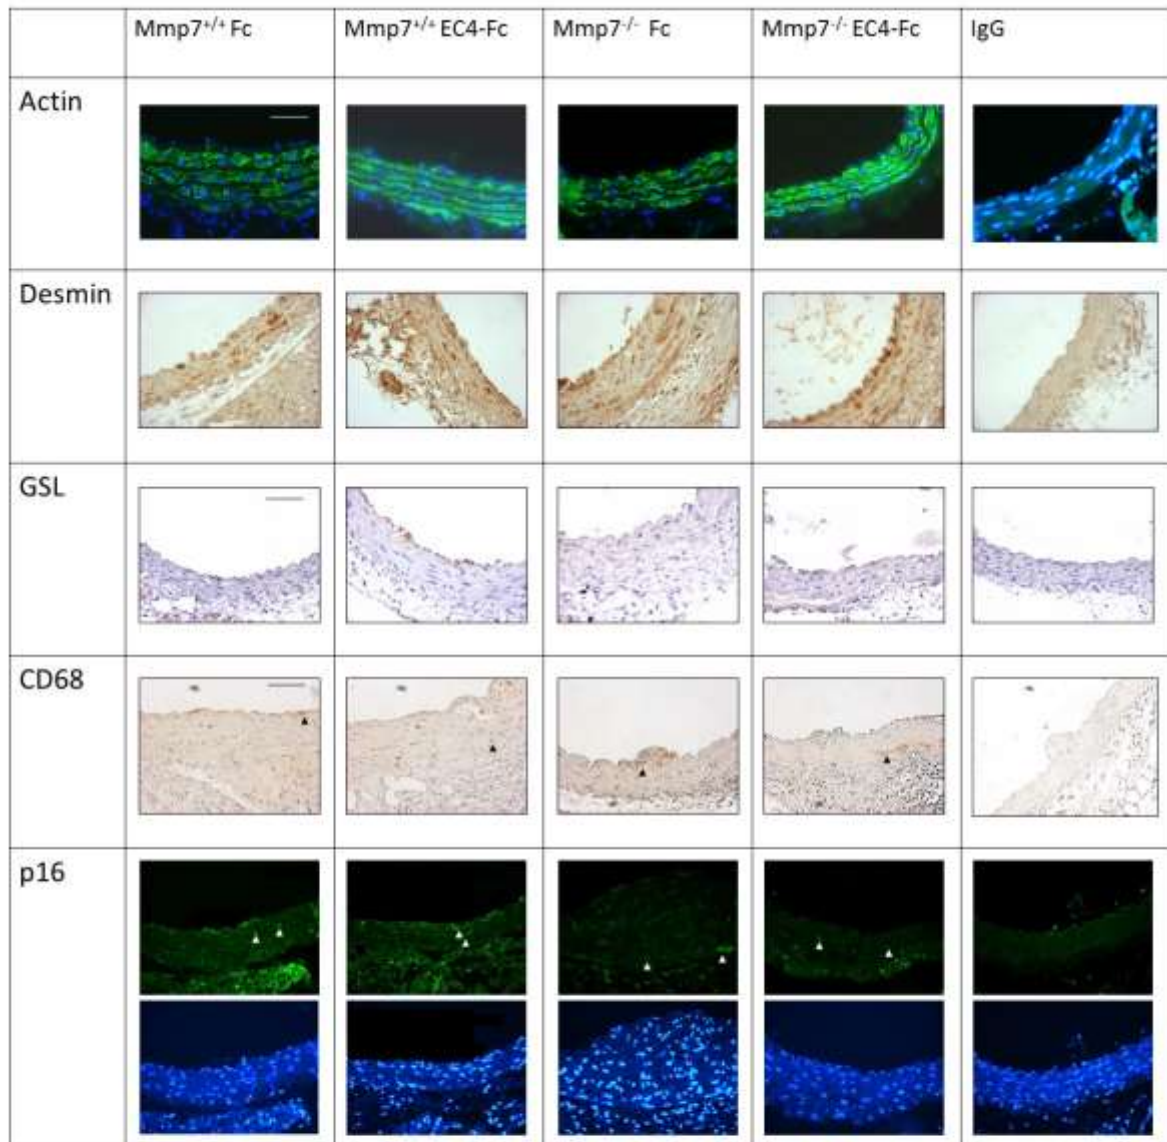

Supplementary Figure 3

Human samples

|       | Positive staining                                                                 | IgG negative control                                                               |
|-------|-----------------------------------------------------------------------------------|------------------------------------------------------------------------------------|
| Actin |  |  |
| CC3   |  |  |
| PCNA  |  |  |

Mouse samples

|       | Positive staining                                                                   | IgG negative control                                                                 |
|-------|-------------------------------------------------------------------------------------|--------------------------------------------------------------------------------------|
| PCNA  |  |  |
| Ki67  |  |  |
| cPARP |  |  |
| CC3   |  |  |
